# Supplementary material for: Direct crosstalk between adult human retinas as suggested by interocular transfer of neurovascular coupling through photic stimulation
Source: Research Square preprint supplement (doi:10.21203/rs.3.rs-5661001/v1), 2025-01-01
Supplement: Supplementary file 1 [file 94d5bbf32b20a59e5a89e735.docx]

Supplementary Material: HC03


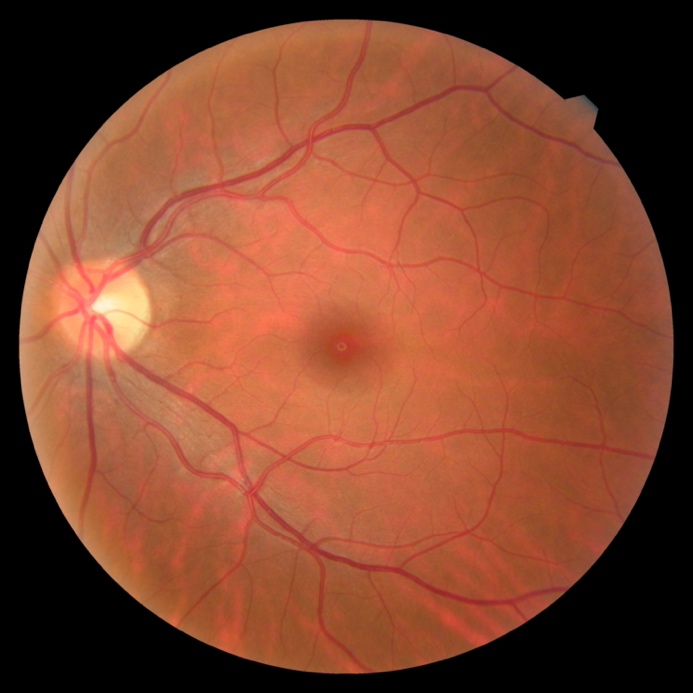


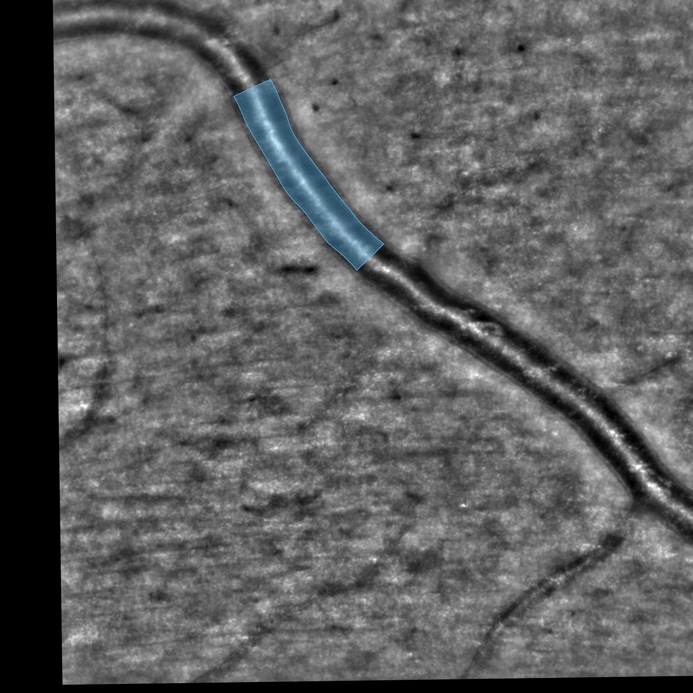


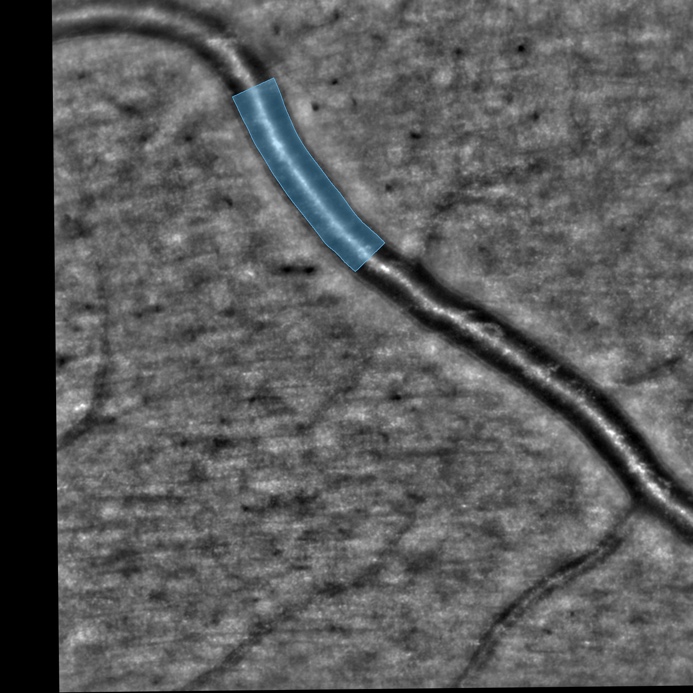


Healthy control’s left eye (HC03 case). Top: Color fundus photography. Middle: rtx1 fundus after contralateral photic stimulation. Right: rtx1 fundus after ipsilateral photic stimulation.

Supplementary Material: HC08


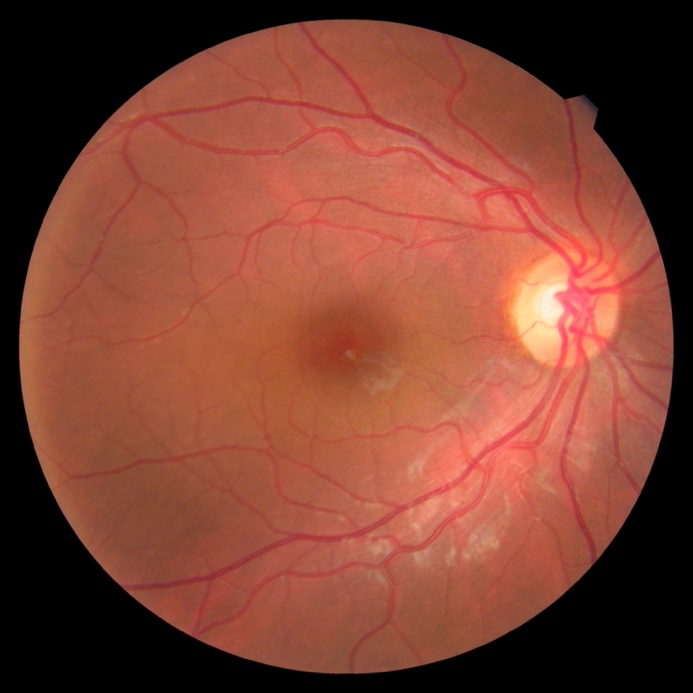


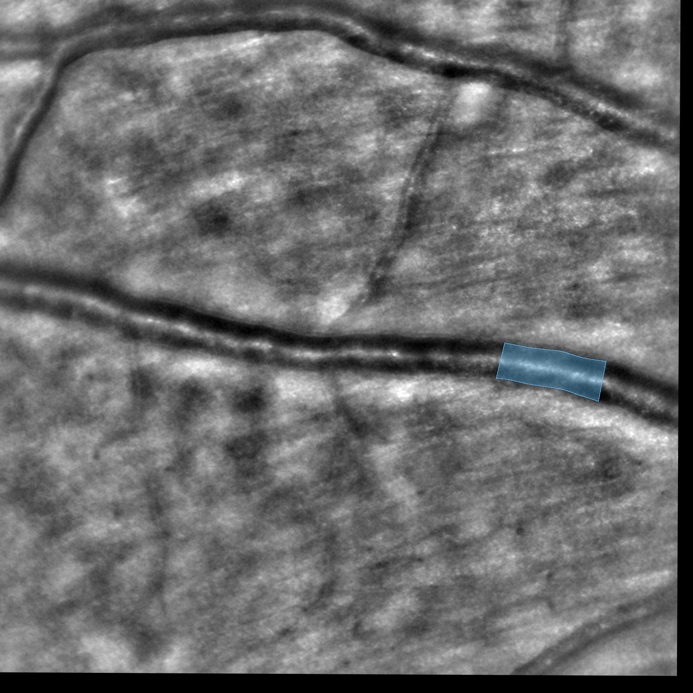


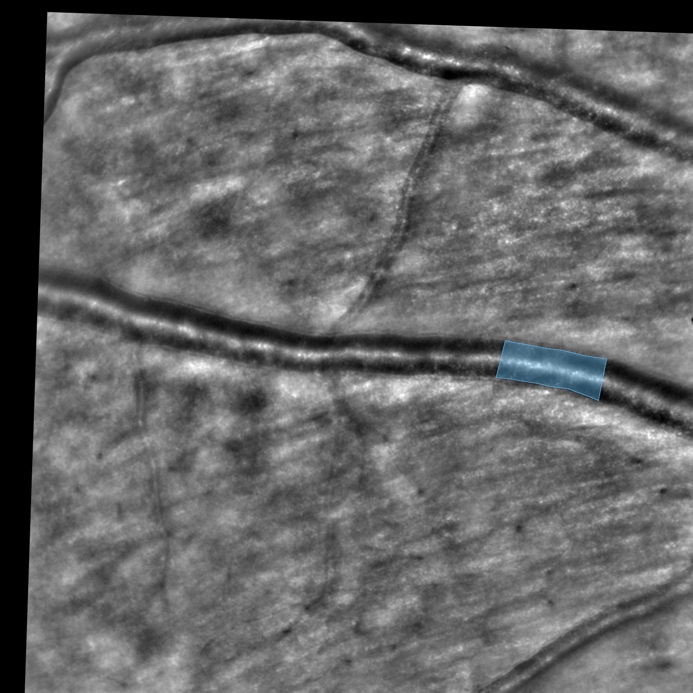


Healthy control’s right eye (HC08 case). Top: Color fundus photography. Middle: rtx1 fundus after contralateral photic stimulation. Right: rtx1 fundus after ipsilateral photic stimulation.

Supplementary Material: DM02


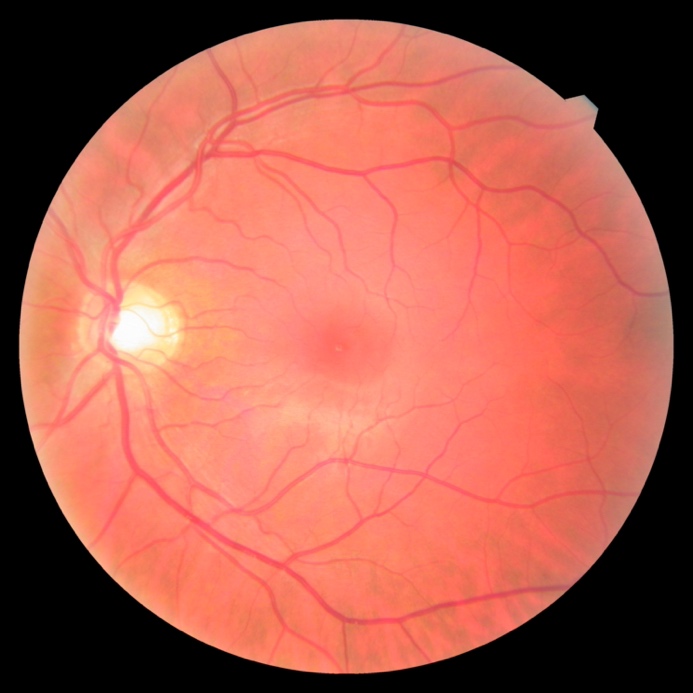


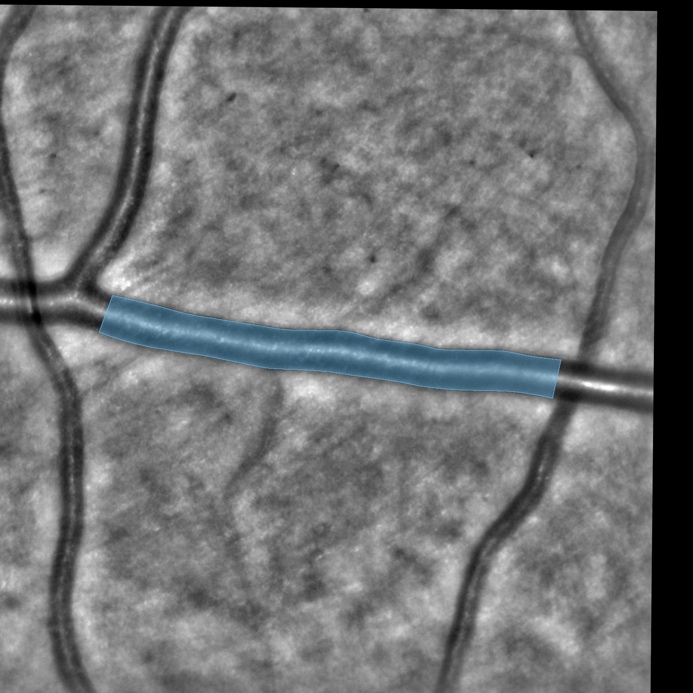


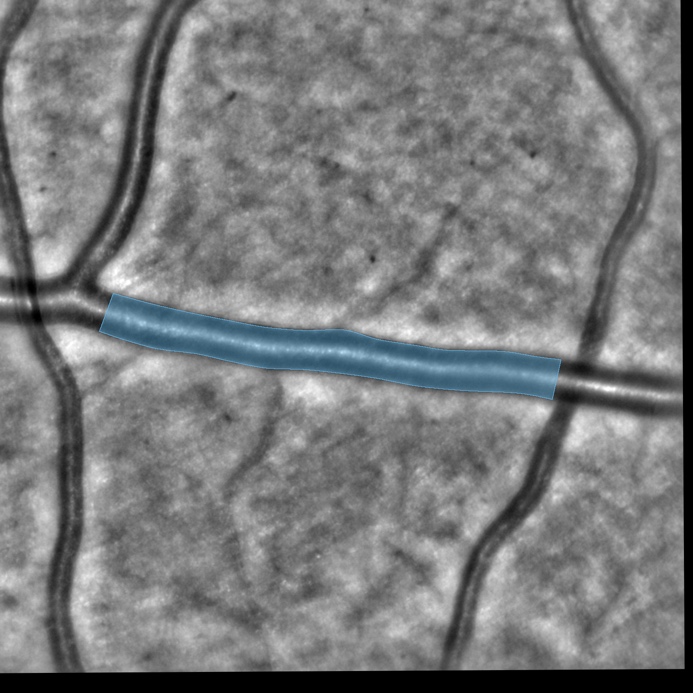


Diabetic patient’s left eye (DM02 case). Top: Color fundus photography. Middle: rtx1 fundus after contralateral photic stimulation. Right: rtx1 fundus after ipsilateral photic stimulation.

Supplementary Material: DM04


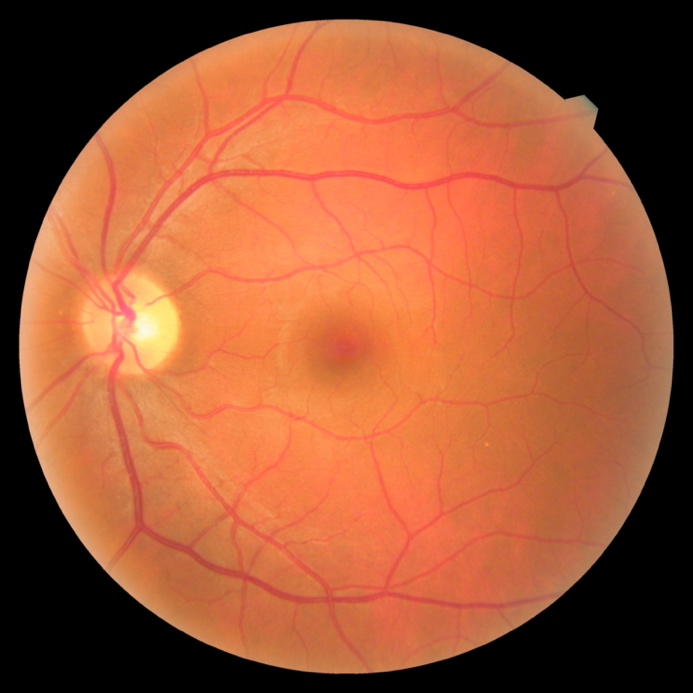


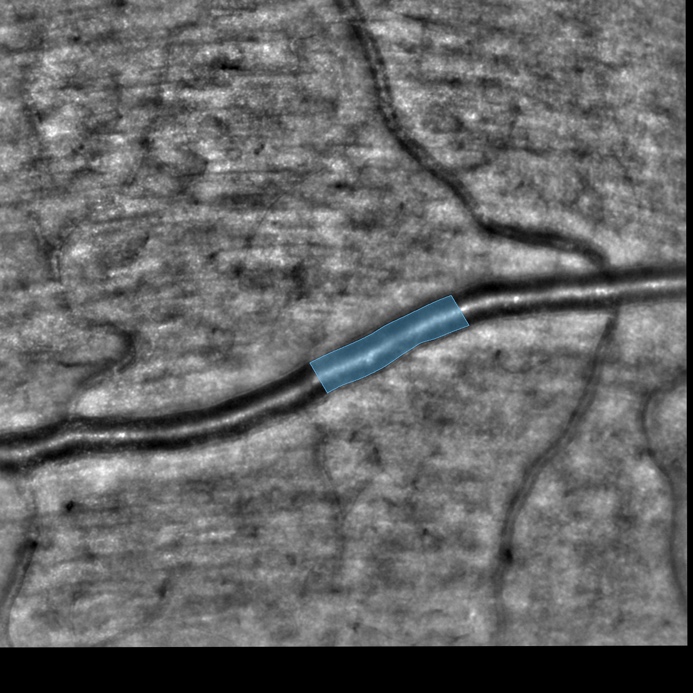


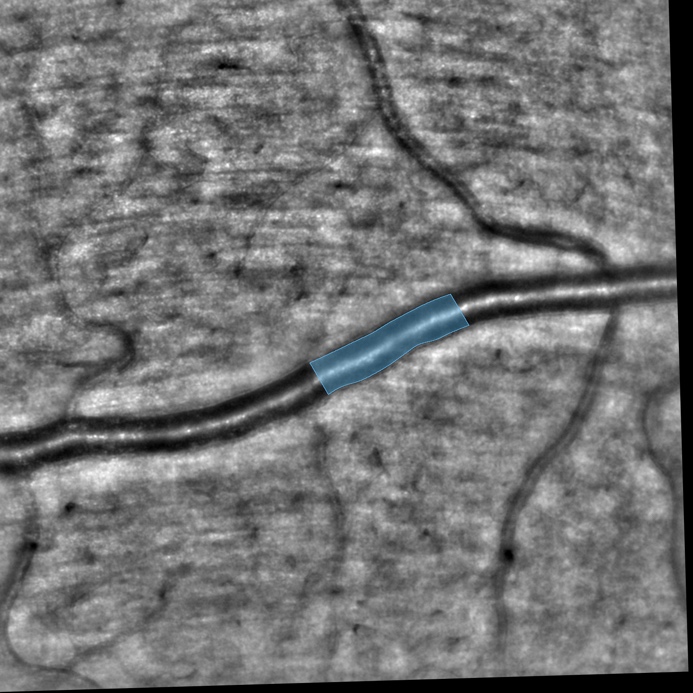


Diabetic patient’s left eye (DM04 case). Top: Color fundus photography. Middle: rtx1 fundus after contralateral photic stimulation. Right: rtx1 fundus after ipsilateral photic stimulation.
